# Supplementary material
Source: HighWire-hosted journal article supplement (https://www.cmajopen.ca/content/suppl/2023/08/15/11.4.E736)
Supplement: open-2022-0171-coreq_and_gripp-checklist.pdf [file open-2022-0171-coreq_and_gripp-checklist.pdf]

## Consolidated criteria for reporting qualitative studies (COREQ): 32-item checklist

| Topic                                          | Item No. | Guide Questions/Description                                                                                                                               | Reported on Page No. |
|------------------------------------------------|----------|-----------------------------------------------------------------------------------------------------------------------------------------------------------|----------------------|
| <b>Domain 1: Research team and reflexivity</b> |          |                                                                                                                                                           |                      |
| <i>Personal Characteristics</i>                |          |                                                                                                                                                           |                      |
| Interviewer/facilitator                        | 1        | Which author/s conducted the interview or focus group?                                                                                                    | 6                    |
| Credentials                                    | 2        | What were the researcher's credentials? E.g., PhD, MD                                                                                                     | 1                    |
| Occupation                                     | 3        | What was their occupation at the time of the study?                                                                                                       | 1                    |
| Gender                                         | 4        | Was the researcher male or female?                                                                                                                        | -                    |
| Experience and training                        | 5        | What experience or training did the researcher have?                                                                                                      | 6, 7                 |
| <i>Relationship with participants</i>          |          |                                                                                                                                                           |                      |
| Relationship established                       | 6        | Was a relationship established prior to study commencement?                                                                                               | 5, 6                 |
| Participant knowledge of the interviewer       | 7        | What did the participants know about the researcher? e.g., personal goals, reasons for doing the research                                                 | 5, 6                 |
| Interviewer characteristics                    | 8        | What characteristics were reported about the interviewer/facilitator? e.g., Bias, assumptions, reasons and interests in the research topic                | 5, 6                 |
| <b>Domain 2: Study design</b>                  |          |                                                                                                                                                           |                      |
| <i>Theoretical framework</i>                   |          |                                                                                                                                                           |                      |
| Methodological orientation and theory          | 9        | What methodological orientation was stated to underpin the study? e.g., grounded theory, discourse analysis, ethnography, phenomenology, content analysis | 5                    |
| <i>Participant selection</i>                   |          |                                                                                                                                                           |                      |
| Sampling                                       | 10       | How were participants selected? e.g., purposive, convenience, consecutive, snowball                                                                       | 5, 6                 |
| Method of approach                             | 11       | How were participants approached? e.g., face-to-face, telephone, mail, email                                                                              | 5, 6                 |
| Sample size                                    | 12       | How many participants were in the study?                                                                                                                  | 8                    |
| Non-participation                              | 13       | How many people refused to participate or dropped out? Reasons?                                                                                           | -                    |
| <i>Setting</i>                                 |          |                                                                                                                                                           |                      |
| Setting of data collection                     | 14       | Where was the data collected? e.g., home, clinic, workplace                                                                                               | 5, 6                 |

|                                        |    |                                                                                                                                  |                         |
|----------------------------------------|----|----------------------------------------------------------------------------------------------------------------------------------|-------------------------|
| Presence of non-participants           | 15 | Was anyone else present besides the participants and researchers?                                                                | 6                       |
| Description of sample                  | 16 | What are the important characteristics of the sample? e.g., demographic data, date                                               | Table 1                 |
| Interview guide                        | 17 | Were questions, prompts, guides provided by the authors?<br>Was it pilot tested?                                                 | 5, 6                    |
| Repeat interviews                      | 18 | Were repeat interviews carried out? If yes, how many?                                                                            | 5,6                     |
| Audio/visual recording                 | 19 | Did the research use audio or video recording to collect the data?                                                               | 7                       |
| Field notes                            | 20 | Were field notes made during and/or after the interview or focus group?                                                          | 7, 8                    |
| Duration                               | 21 | What was the duration of the interviews or focus groups?                                                                         | 5                       |
| Data saturation                        | 22 | Was data saturation discussed?                                                                                                   | N/A                     |
| Transcripts returned                   | 23 | Were transcripts returned to participants for comment and/or correction?                                                         | 7                       |
| <b>Domain 3: Analysis and findings</b> |    |                                                                                                                                  |                         |
| <i>Data analysis</i>                   |    |                                                                                                                                  |                         |
| Number of data coders                  | 24 | How many data coders coded the data?                                                                                             | 8                       |
| Description of the coding tree         | 25 | Did authors provide a description of the coding tree?                                                                            | 8                       |
| Derivation of themes                   | 26 | Were themes identified in advance or derived from the data?                                                                      | 8                       |
| Software                               | 27 | What software, if applicable, was used to manage this data?                                                                      | 8                       |
| Participant checking                   | 28 | Did participants provide feedback on the findings?                                                                               | 7, 8                    |
| Quotations presented                   | 29 | Were participant quotations presented to illustrate the themes/findings? Was each quotation identified? e.g., participant number | Figure 1                |
| Data and findings consistent           | 30 | Was there consistency between the data presented and the findings?                                                               | Table 2, Figure 1, 9-11 |
| Clarity of major themes                | 31 | Were major themes clearly presented in the findings?                                                                             | 9-11                    |
| Clarity of minor themes                | 32 | Is there a description of diverse cases or discussion of minor themes?                                                           | Figure 1, Table 2, 9-11 |

## GRIPP 2 checklist

| Section and topic                    | Item                                                                                                                                       | Reported on page No. |
|--------------------------------------|--------------------------------------------------------------------------------------------------------------------------------------------|----------------------|
| 1. Aim                               | Report the aim of PPI in study.                                                                                                            | 4, 7                 |
| 2. Methods                           | Provide a clear description of the methods used for PPI in the study.                                                                      | 6, 7                 |
| 3. Study results                     | Outcomes – report the results of the PPI in the study, including positive and negative outcomes.                                           | 8-11                 |
| 4. Discussion and conclusions        | Outcomes – comment on the extent to which PPI influences the study overall. Describe the positive and negative effects.                    | 11-14                |
| 5. Reflections/critical perspectives | Comment critically on the study, reflecting on the things that went well and those that did not, so others can learn from this experience. | 14                   |

Abbreviation: PPI, Patient and Public Involvement
